# Supplementary material
Source: PubMed Central journal article supplement (PMC5711400)

## **Online Data Supplement**

### **Relationship between Race and the Effect of Fluids on Long-term Mortality after Acute Respiratory Distress Syndrome: Secondary Analysis of the NHLBI Fluid and Catheter Treatment Trial**

Sarah E Jolley, MD, MSc, Catherine L Hough, MD, MSc, Gilles Clermont, MD, MSc, Douglas Hayden, MA, Suqin Hou, BS, David Schoenfeld, PhD, Nicholas L Smith, PhD, Boyd Taylor Thompson, MD, Gordon R Bernard, MD, Derek C Angus, MD, MPH for the ARDS Network Investigators

| <b>Supplemental Digital Content—1: Baseline characteristics of FACTT and EA-PAC cohorts</b> |                   |                                          |                    |         |
|---------------------------------------------------------------------------------------------|-------------------|------------------------------------------|--------------------|---------|
| Variable                                                                                    | EA-PAC Cohort     | FACTT Cohort that was not part of EA-PAC | Total FACTT cohort | p-value |
| N                                                                                           | 655               | 345                                      | 1000               |         |
| Age, mean (SD <sup>a</sup> )                                                                | 50.10 (16.00)     | 49.09 (16.72)                            | 49.75 (16.00)      | .3423   |
| Sex, female, n (%)                                                                          | 308 (47%)         | 158 (49%)                                | 466 (47%)          | .7390   |
| Race, n (%)                                                                                 |                   |                                          |                    |         |
| White non-Hispanic                                                                          | 445 (68%)         | 196 (57%)                                | 641 (64%)          | .0005   |
| Black non-Hispanic                                                                          | 136 (21%)         | 81 (23%)                                 | 217 (22%)          | .3334   |
| Other                                                                                       | 74 (11%)          | 68 (20%)                                 | 142 (14%)          | .0004   |
| Primary Lung injury, n (%)                                                                  |                   |                                          |                    |         |
| Pneumonia                                                                                   | 299 (46%)         | 172 (50%)                                | 471 (47%)          | .2564   |
| Sepsis                                                                                      | 145 (22%)         | 88 (26%)                                 | 233 (24%)          | .2707   |
| Aspiration                                                                                  | 103 (16%)         | 46 (13%)                                 | 149 (15%)          | .3060   |
| Trauma                                                                                      | 50 (8%)           | 24 (7%)                                  | 74 (7%)            | .7056   |
| Multiple transfusions                                                                       | 6 (1%)            | 3 (1%)                                   | 9 (1%)             | .9999   |
| Other                                                                                       | 46 (7%)           | 11 (3%)                                  | 57 (6%)            | .0141   |
| Co-existing Conditions, n (%)                                                               |                   |                                          |                    |         |
| None                                                                                        | 444 (68%)         | 216 (63%)                                | 660 (66%)          | .1065   |
| Diabetes                                                                                    | 110 (17%)         | 63 (19%)                                 | 173 (18%)          | .6608   |
| HIV <sup>b</sup> Infection or AIDS                                                          | 36 (6%)           | 35 (10%)                                 | 71 (7%)            | .0098   |
| Cirrhosis                                                                                   | 24 (4%)           | 9 (3%)                                   | 33 (3%)            | .4578   |
| Solid Tumors                                                                                | 12 (2%)           | 3 (1%)                                   | 15 (2%)            | .2823   |
| Leukemia                                                                                    | 12 (2%)           | 10 (3%)                                  | 22 (2%)            | .3657   |
| Lymphoma                                                                                    | 6 (1%)            | 7 (2%)                                   | 13 (1%)            | .1561   |
| Immunosuppression                                                                           | 51 (8%)           | 27 (8%)                                  | 78 (8%)            | .9999   |
| APACHE <sup>c</sup> III score, mean (SD)                                                    | 93.67 (31.29)     | 95.04 (30.15)                            | 94.15 (30.89)      | .5103   |
| Medical ICU, n (%)                                                                          | 421 (64%)         | 242 (70%)                                | 663 (66%)          | .0674   |
| Cardiorespiratory Variables, mean (SD)                                                      |                   |                                          |                    |         |
| Mean arterial pressure (mm Hg)                                                              | 77.31 (14.28)     | 76.83 (13.97)                            | 77.15 (14.16)      | .6101   |
| Cardiac index (liters/min/m <sup>2</sup> )                                                  | 4.12 (1.36)       | 4.42 (1.54)                              | 4.23 (1.43)        | .0427   |
| Vasopressor use, n (%)                                                                      | 248 (39%)         | 150 (44%)                                | 398 (40%)          | .1012   |
| Pre-randomization fluid balance (mL)                                                        | 2875.34 (3590.32) | 2552.95 (3417.14)                        | 2763.99 (3533.02)  | .1774   |

**ARDS Fluids and Race 3**

|                                                 |                |                    |                    |        |
|-------------------------------------------------|----------------|--------------------|--------------------|--------|
| PaO <sub>2</sub> :FiO <sub>2</sub> <sup>d</sup> | 126.69 (57.03) | 127.40 (61.63)     | 126.93 (58.61)     | .8589  |
| Tidal volume (mL), mean (SD)                    | 451.99 (98.69) | 490.40<br>(122.36) | 465.19<br>(108.88) | <.0001 |
| Tidal volume (mL/kg of PBW), mean (SD)          | 6.31 (2.74)    | 6.82 (3.08)        | 6.49 (2.87)        | <.0001 |

<sup>a</sup>SD: standard deviation, <sup>b</sup>HIV: Human Immunodeficiency Virus, AIDS: Acquired Immunodeficiency Syndrome, <sup>c</sup>APACHE: Acute Physiology and Chronic Health Elements Score, <sup>d</sup>PaO<sub>2</sub>:FiO<sub>2</sub>: partial pressure of oxygen to fraction of inspired oxygen ratio

| <b>Supplemental Digital Content—2: Mortality status for FACTT and EAPAC participants</b> |                                 |    |                              |    |
|------------------------------------------------------------------------------------------|---------------------------------|----|------------------------------|----|
|                                                                                          | <b>Included in EAPAC Cohort</b> |    | <b>Not Included in EAPAC</b> |    |
|                                                                                          | <b>(N=655)</b>                  |    | <b>(N=345)</b>               |    |
|                                                                                          | N                               | %  | N                            | %  |
| <b>Alive with &lt; 330 days of follow up</b>                                             | 89                              | 9  | 226                          | 23 |
| <b>Alive with &gt; 330 days of follow up</b>                                             | 350                             | 35 |                              |    |
| <b>Died during hospitalization</b>                                                       | 165                             | 17 | 119                          | 12 |
| <b>Died after hospitalization</b>                                                        | 51                              | 5  |                              |    |

| <b>Supplemental Digital Content--3:Propensity Score Strata</b> |                           |                         |     |                           |      |     |
|----------------------------------------------------------------|---------------------------|-------------------------|-----|---------------------------|------|-----|
|                                                                | <b>Non-Hispanic White</b> |                         |     | <b>Non-Hispanic Black</b> |      |     |
| <b>Female</b>                                                  | %                         |                         | N   | %                         |      | N   |
| Quartile 1                                                     | 54                        |                         | 204 | 55                        |      | 11  |
| Quartile 2                                                     | 49                        |                         | 185 | 55                        |      | 29  |
| Quartile 3                                                     | 50                        |                         | 158 | 37                        |      | 56  |
| Quartile 4                                                     | 39                        |                         | 94  | 45                        |      | 121 |
| <b>Age</b>                                                     | Mean                      | Standard Deviation (SD) |     | Mean                      | SD   |     |
| Quartile 1                                                     | 55                        | 16                      | 204 | 50                        | 19   | 11  |
| Quartile 2                                                     | 51                        | 15                      | 185 | 55                        | 19   | 29  |
| Quartile 3                                                     | 50                        | 17                      | 158 | 52                        | 17   | 56  |
| Quartile 4                                                     | 49                        | 14                      | 94  | 44                        | 14   | 121 |
| <b>Acute Physiology Score-APACHE</b>                           |                           |                         |     |                           |      |     |
| Quartile 1                                                     | 74                        | 27                      | 196 | 78                        | 35   | 11  |
| Quartile 2                                                     | 82                        | 27                      | 178 | 84                        | 22   | 29  |
| Quartile 3                                                     | 96                        | 26                      | 154 | 97                        | 28   | 55  |
| Quartile 4                                                     | 86                        | 30                      | 90  | 90                        | 32   | 118 |
| <b>Chronic Health Elements Score-APACHE</b>                    |                           |                         |     |                           |      |     |
| Quartile 1                                                     | 0.53                      | 2.28                    | 196 | 0.00                      | 0.00 | 11  |
| Quartile 2                                                     | 2.50                      | 5.90                    | 179 | 2.07                      | 6.12 | 29  |
| Quartile 3                                                     | 2.89                      | 6.10                    | 155 | 2.55                      | 5.55 | 55  |
| Quartile 4                                                     | 4.53                      | 7.70                    | 90  | 6.18                      | 9.58 | 119 |
| <b>PaO2:FiO2</b>                                               |                           |                         |     |                           |      |     |
| Quartile 1                                                     | 153                       | 65                      | 197 | 117                       | 37   | 11  |
| Quartile 2                                                     | 156                       | 72                      | 174 | 168                       | 71   | 26  |
| Quartile 3                                                     | 148                       | 64                      | 155 | 154                       | 80   | 53  |
| Quartile 4                                                     | 161                       | 66                      | 89  | 163                       | 88   | 116 |
| <b>Shock</b>                                                   | %                         |                         |     | %                         |      |     |
| Quartile 1                                                     | 35                        |                         | 203 | 40                        |      | 10  |
| Quartile 2                                                     | 38                        |                         | 182 | 36                        |      | 28  |
| Quartile 3                                                     | 37                        |                         | 158 | 32                        |      | 56  |
| Quartile 4                                                     | 23                        |                         | 94  | 30                        |      | 121 |

### **Sensitivity Analysis:**

We conducted a sensitivity analysis to determine the effect of missing data on our study findings. We used the method described in <http://onlinelibrary.wiley.com/doi/10.1002/sim.6274/abstract> but we had to modify it, following the direction of one of the authors, in order to account for the fact that we were using a multi-state model rather than a simple survival model. We used the following approach. First we fit the multi-state model to the data. Then from this model we calculated the probability that each patient would die before one year. For patients who were alive at one year this probability was zero and for those that died it was one. For other patients it was a probability strictly between zero and one. In these cases, we also calculated the standard error of this probability. We focused the sensitivity analysis on the comparison of the treatment groups among black patients because this was the only comparison which was statistically significant. We then conducted a multiple imputation analysis as follows.

We imputed 100 samples of the binary variable of whether or not the patient died before one year under the assumption of dependent censorship as follows: First we fit a beta distribution to their estimated of probability of death and its standard error. Next, we drew their probability of death from this beta distribution (in order to have a proper imputation, see Rubin) for patients eligible for EAPAC. We then converted these probabilities to odds and multiplied the odds by a factor DL or DC depending on whether they were in the Liberal or Conservative Group respectively. These factors DL and DC ranged from 0.25 to 4, and represent the proportional increase in the odds of death that might occur for a patient after being censored based on their treatment group. When DL and DC equal one the data is *missing at random*. These new odds were then converted back into a probability. No modification was done on the patients who were not eligible for EAPAC (the study had not started when they accrued) because these patients were missing data at random. Finally we used these probabilities to generate binomial random variables as to whether these patients died or not. We then used Rubin's rule to calculate the estimated difference between the treatment groups and its lower 97.5% confidence bound.

Results: The two contour plots show the results of this analysis. Note that even for a differential four fold change in the odds of death the inference is largely unchanged. This is because there are only

15 blacks in the liberal group who were eligible for EAPAC and were missing 1 year follow up. The chance of death in this group ranged from 11% to 26% with a median of 22%. The corresponding conservative group had 12 patients with a range of probabilities from 3% to 9%. Thus even a quite large change in the odds of death had quite a small effect on the inference. The variation in the graph is due to the fact that the multiple imputation was repeated for each choice of DL and DC, so much of the variation is random.

Rubin, D.B. (1976), "Inference and Missing Data," *Biometrika*, 63, 581–592.

# Lower Bound Liberal-Conserv.

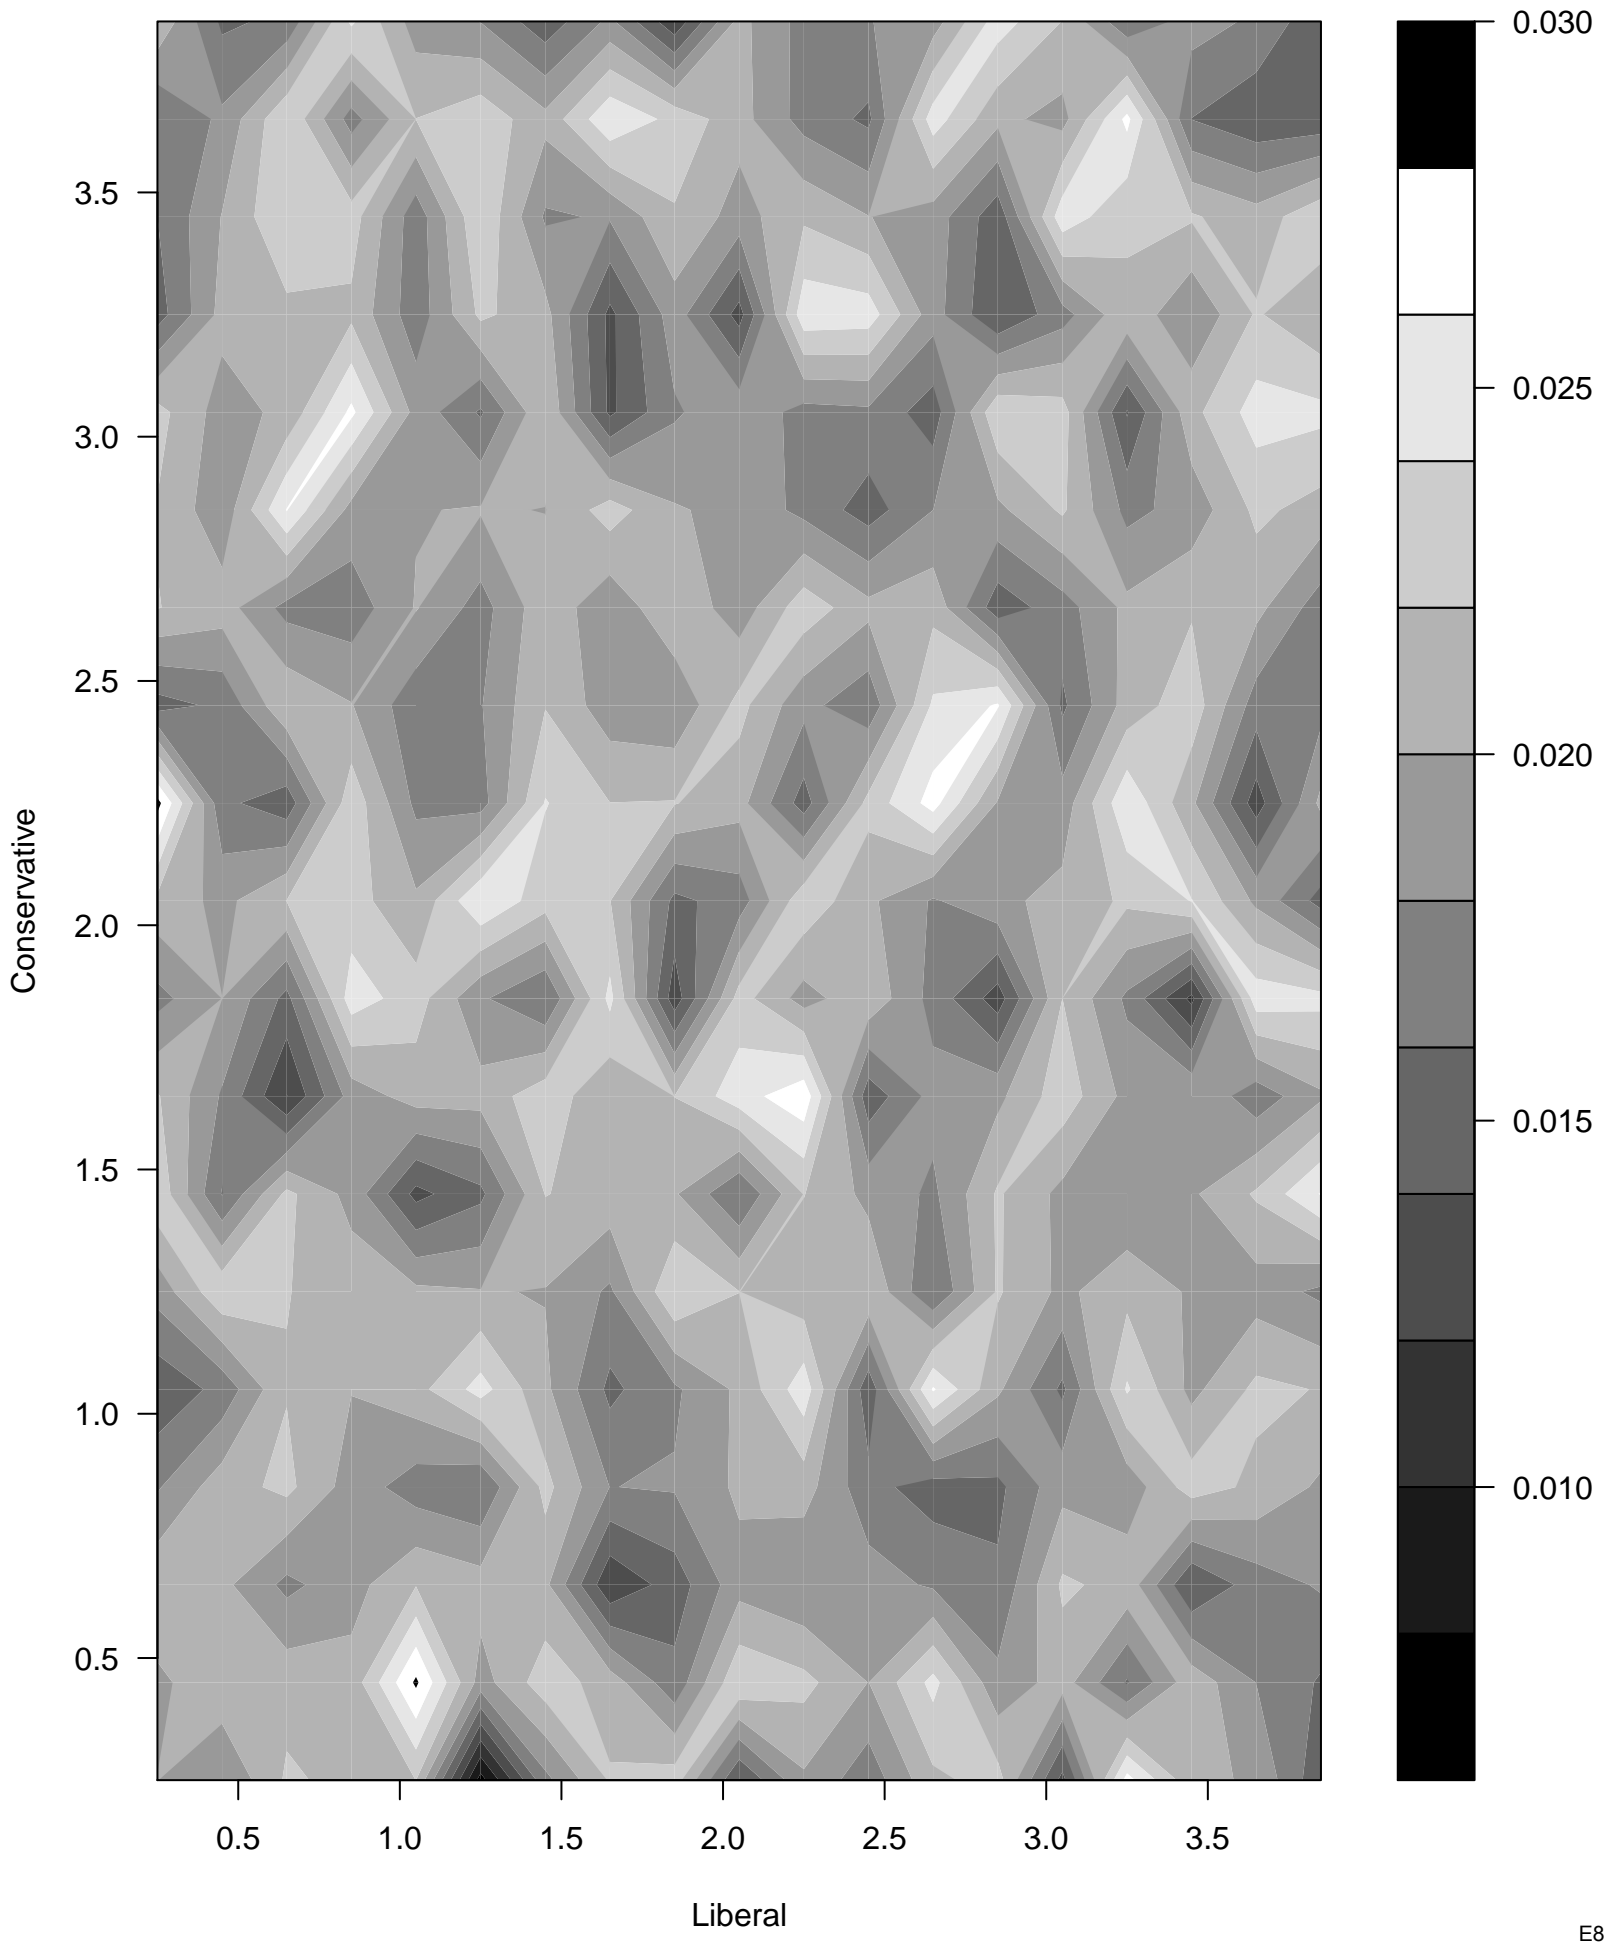



# Liberal-Conservative mortality

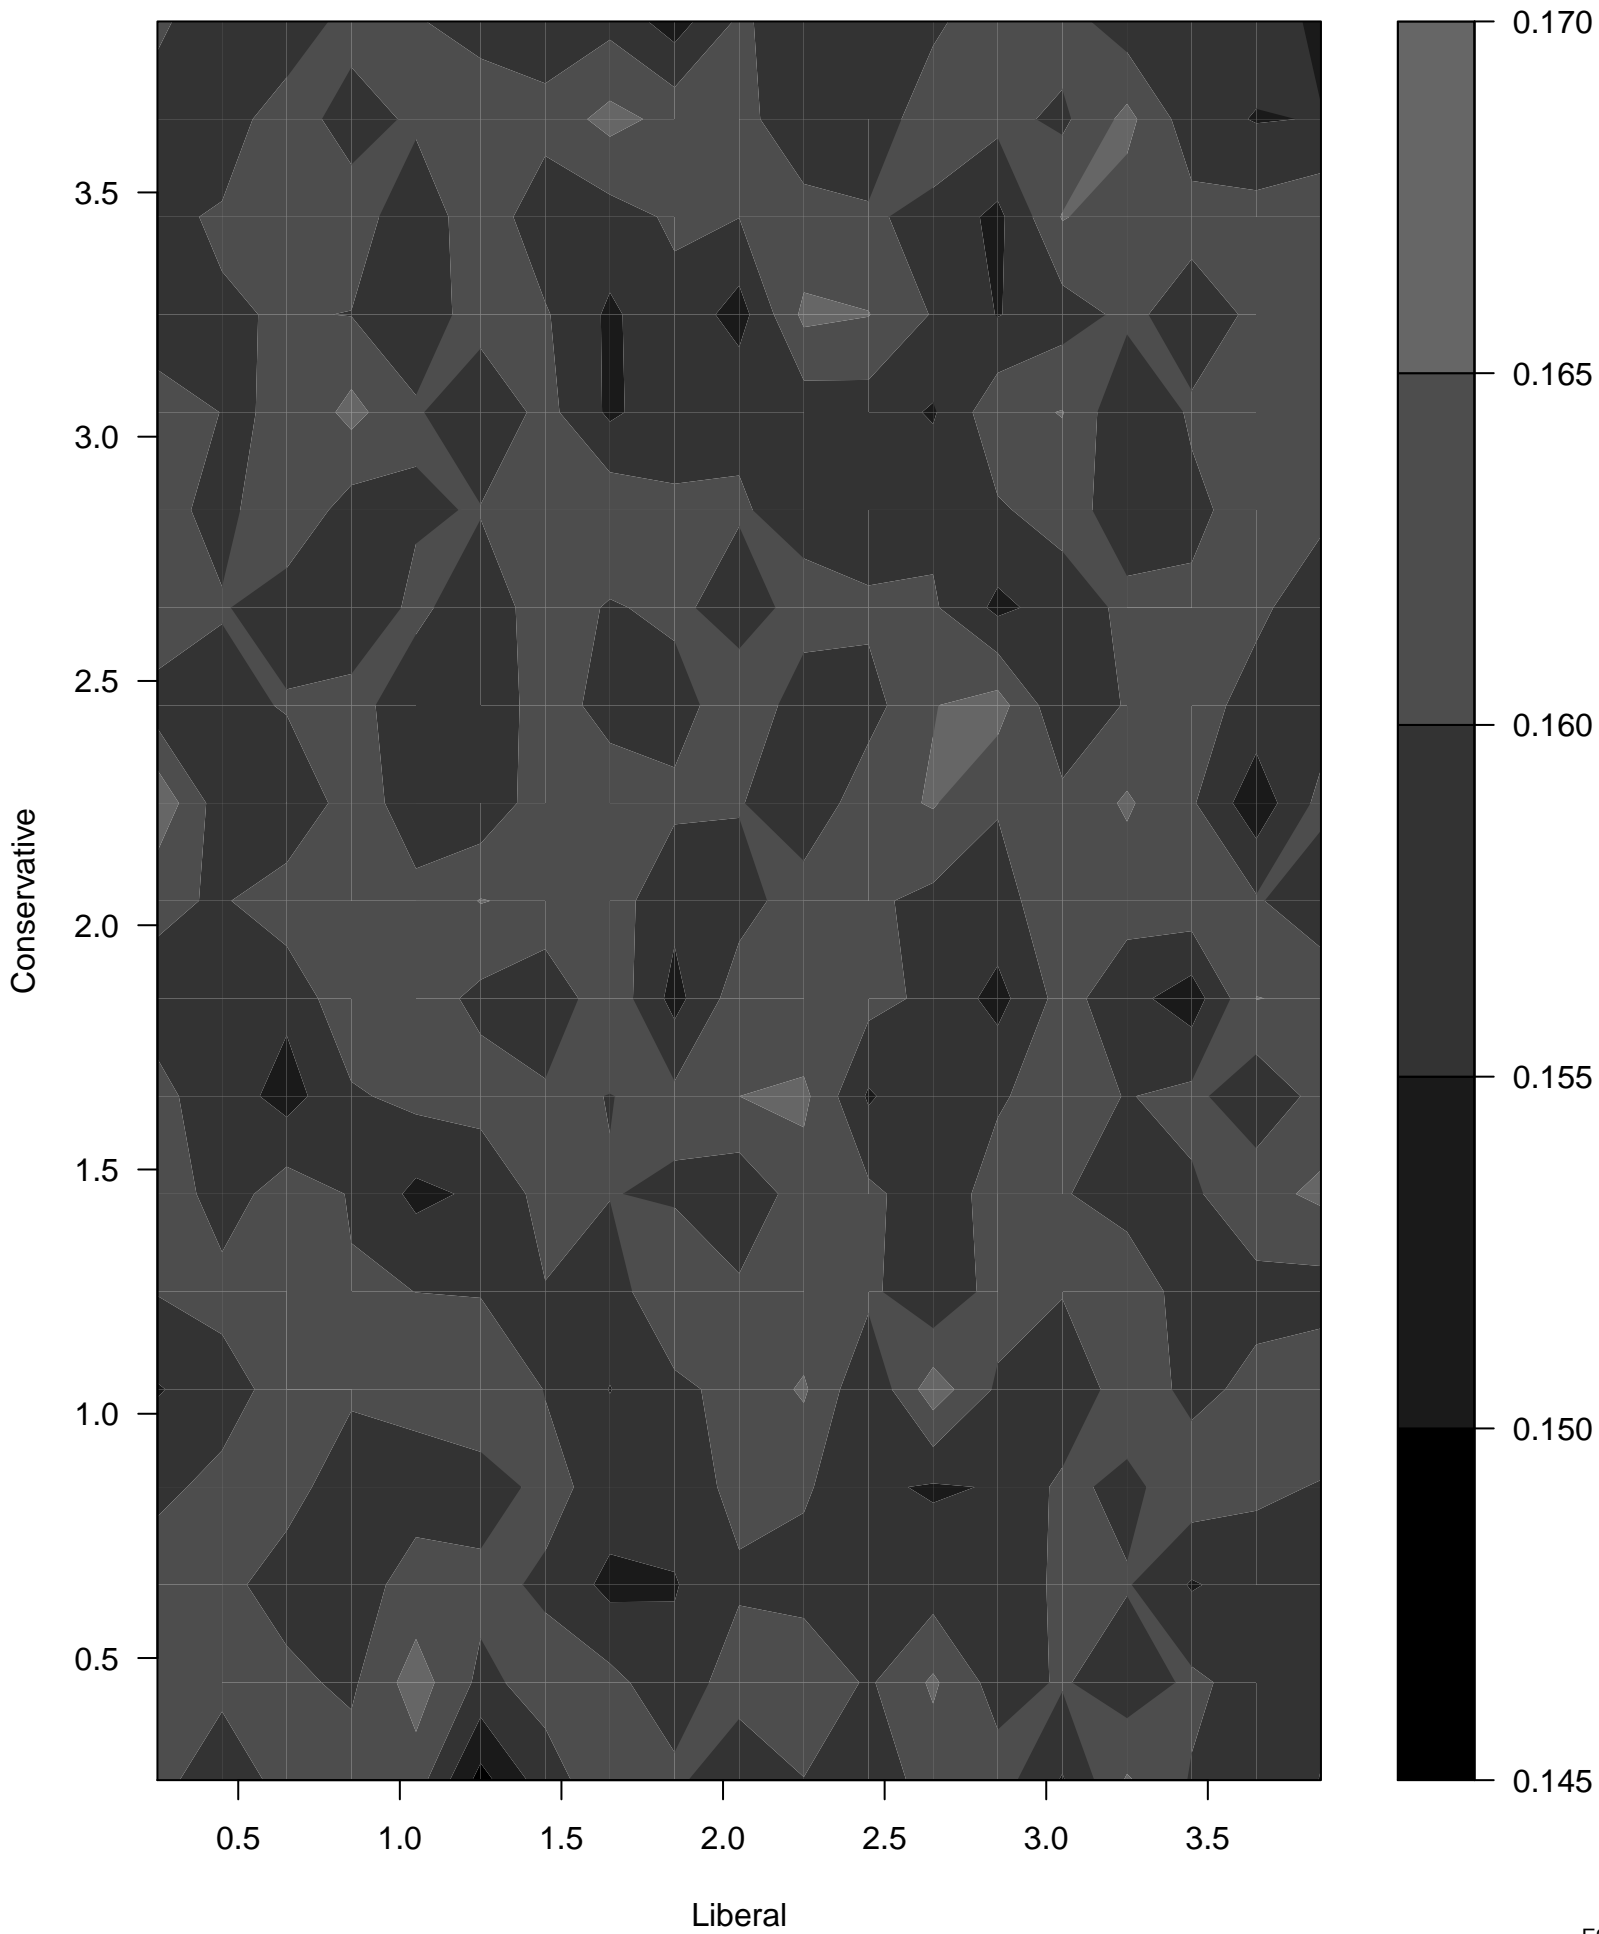

Supplement: AnnalsATS.201611-906OC_jolley_data_supplement.pdf [file AnnalsATS.201611-906OC_jolley_data_supplement.pdf]
